# Supplementary material for: Clinical Features of Gastric Signet Ring Cell Cancer: Results from a Systematic Review and Meta-Analysis
Source: MDPI journal article supplement (doi:10.3390/cancers15215191), 2023-10-28
Supplement: s1 [file s1]

**Figure S1:** Forest plot showing meta-analysis results for Lymphovascular Invasion between SRCC and other histologies (NSRCC, UDC/PDA/mucinous, DC/WMDA/ADK, mixed).

**(A):** in All Stages Gastric Cancer patients. **(B):** in Early Gastric Cancer patients. **(C):** in Advanced Gastric Cancer patients.

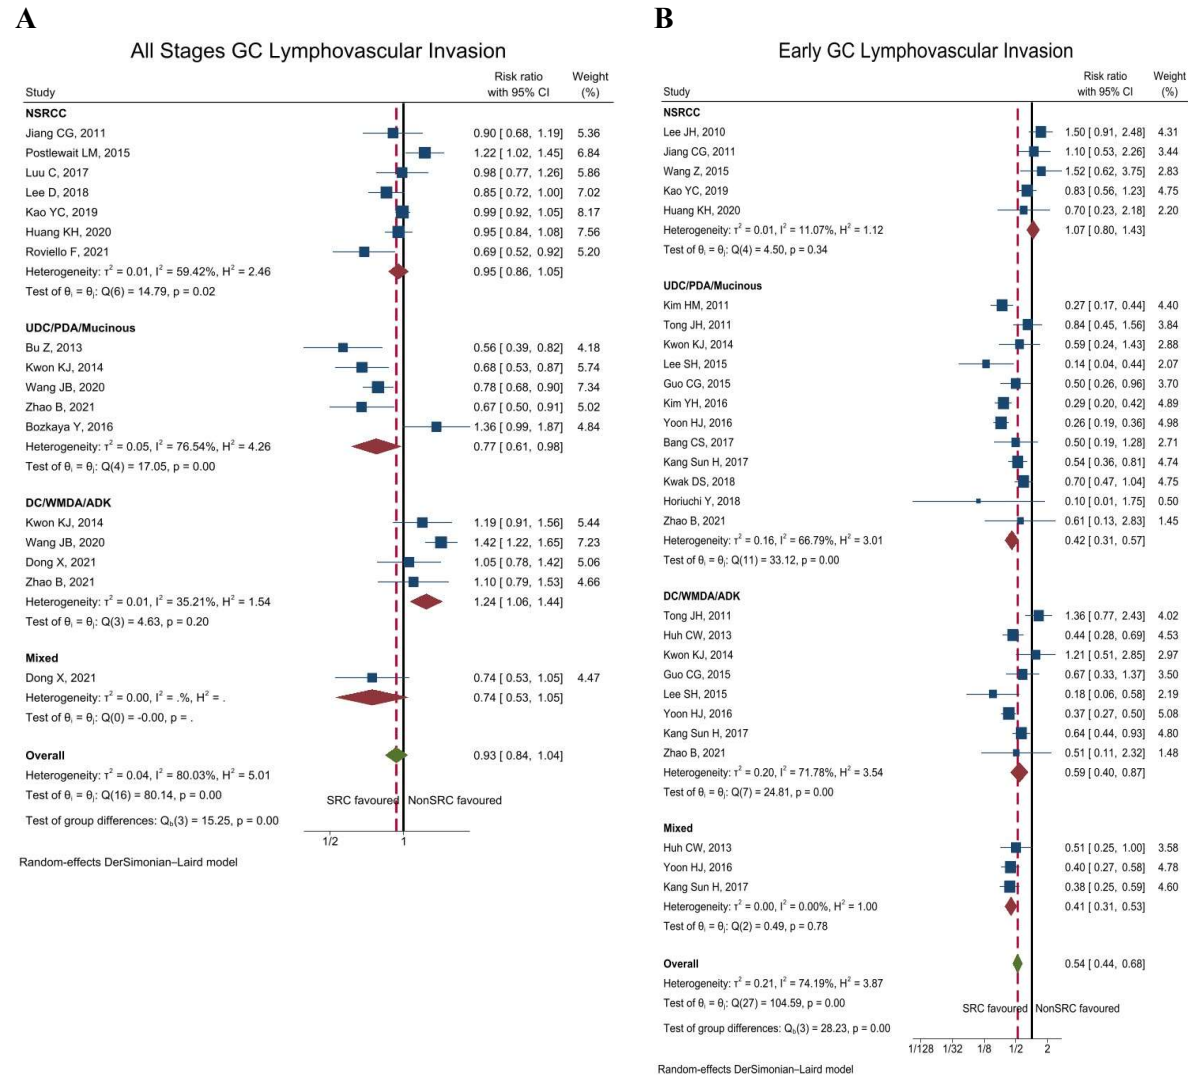

C

## Advanced GC Lymphovascular Invasion

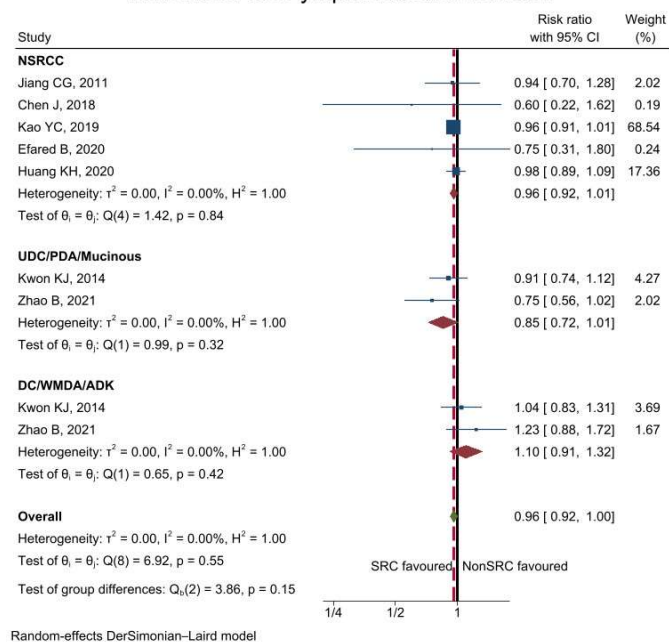

**Abbreviations.** ADK: Adenocarcinoma not otherwise specified; DC: Differentiated Cancer; GC: Gastric Cancer; NSRCC: Non-Signet Ring Cell Carcinoma; PDA: Poorly Differentiated Adenocarcinoma; SRCC: Signet Ring Cell Carcinoma; WMDA: Well/Moderately Differentiated Adenocarcinoma; UDC: Undifferentiated Cancer.
