# Supplementary material for: Clinical Features of Gastric Signet Ring Cell Cancer: Results from a Systematic Review and Meta-Analysis
Source: MDPI journal article supplement (doi:10.3390/cancers15215191), 2023-10-28
Supplement: s1 [file s1]

**Table S2.** Quality assessment of cohort studies according to the Newcastle-Ottawa Scale (NOS).

|           | Study               | Criterion score |               |         | Total    |
|-----------|---------------------|-----------------|---------------|---------|----------|
|           |                     | Selection       | Comparability | Outcome |          |
|           | <b>Author, year</b> | ★★★★            | ★★            | ★★★     | <b>9</b> |
| <b>1</b>  | Efared B 2020       | ★★★             | ★             | ★★      | 6        |
| <b>2</b>  | Lee JH 2010         | ★★★★            | ★★            | ★★      | 8        |
| <b>3</b>  | Nam MJ 2010         | ★★★★            | ★★            | ★★      | 8        |
| <b>4</b>  | Kim HM 2011         | ★★★             | ★★            | ★★      | 7        |
| <b>5</b>  | Tong JH 2011        | ★★★             | ★★            | ★★      | 7        |
| <b>6</b>  | Huh CW 2013         | ★★★★            | ★★            | ★★      | 8        |
| <b>7</b>  | Kim BS 2014         | ★★★★            | ★★            | ★★★     | 9        |
| <b>8</b>  | Guo CG 2015         | ★★★★            | ★★            | ★★      | 8        |
| <b>9</b>  | Jin EH 2015         | ★★★★            | ★★            | ★★      | 8        |
| <b>10</b> | Lee SH 2015         | ★★★★            | ★★            | ★★      | 8        |
| <b>11</b> | Wang Z 2015         | ★★★             | ★★            | ★★      | 7        |
| <b>12</b> | Hwang CS 2016       | ★★★             | ★             | ★★      | 6        |
| <b>13</b> | Imamura T 2016      | ★★★             | ★★            | ★★      | 7        |
| <b>14</b> | Kim YH 2016         | ★★★★            | ★             | ★       | 6        |
| <b>15</b> | Yoon HJ 2016        | ★★★★            | ★             | ★       | 6        |
| <b>16</b> | Bang CS 2017        | ★★★             | ★             | ★★      | 6        |
| <b>17</b> | Kang Sun H 2017     | ★★★             | ★★            | ★★★★    | 8        |
| <b>18</b> | Lee IS 2017         | ★★★★            | ★★            | ★★      | 8        |
| <b>19</b> | Horiuchi Y 2018     | ★★★★            | ★★            | ★★      | 8        |
| <b>20</b> | Kwak DS 2018        | ★★★★            | ★★            | ★★      | 8        |
| <b>21</b> | Nakamura R 2019     | ★★★             | ★             | ★★      | 6        |
| <b>22</b> | Ryu DG 2019         | ★★★             | ★★            | ★★      | 7        |
| <b>23</b> | Zhu ZL 2020         | ★★★             | ★★            | ★★      | 7        |
| <b>24</b> | Zou Y 2020          | ★★★             | ★★            | ★★      | 7        |
| <b>25</b> | Zu H 2014           | ★★★             | ★             | ★★      | 6        |
| <b>26</b> | Alshehri A 2020     | ★★★★            | ★★            | ★★      | 8        |
| <b>27</b> | Cho JH 2015         | ★★★             | ★★            | ★★      | 7        |
| <b>28</b> | Men HT 2016         | ★★★             | ★★            | ★       | 6        |
| <b>29</b> | Choi JH 2020        | ★★★             | ★★            | ★★★★    | 8        |
| <b>30</b> | Zhang M 2010        | ★★★★            | ★★            | ★★      | 8        |
| <b>31</b> | Chiu CT 2011        | ★★★★            | ★             | ★★      | 7        |

|    |                      |      |     |     |   |
|----|----------------------|------|-----|-----|---|
| 32 | Jiang CG 2011        | ★★★★ | ★★  | ★★  | 8 |
| 33 | Lee HH 2012          | ★★★  | ★   | ★★  | 6 |
| 34 | Bu Z 2013            | ★★★  | ★   | ★★  | 6 |
| 35 | Jiang H 2013         | ★★★★ | ★★  | ★★  | 8 |
| 36 | Kwon KJ 2014         | ★★★  | ★★  | ★★  | 7 |
| 37 | Shim JH 2014         | ★★★★ | ★   | ★★  | 7 |
| 38 | Liu X 2015           | ★★★★ | ★★  | ★★  | 8 |
| 39 | Hsu JT 2016          | ★★★★ | ★★  | ★★  | 8 |
| 40 | Kong P 2016          | ★★★  | ★★  | ★   | 6 |
| 41 | Lu M 2016            | ★★★★ | ★★  | ★★  | 8 |
| 42 | Tang X 2016          | ★★★  | ★★  | ★★  | 7 |
| 43 | Wang Z 2016          | ★★★  | ★★  | ★   | 6 |
| 44 | Chon HJ 2017         | ★★★★ | ★★  | ★★★ | 9 |
| 45 | Chen J 2018          | ★★★★ | ★   | ★   | 6 |
| 46 | Lee D 2018           | ★★★  | ★   | ★★  | 6 |
| 47 | Kao YC 2019          | ★★★  | ★★  | ★★  | 7 |
| 48 | Ahn H 2020           | ★★★  | ★★  | ★★  | 7 |
| 49 | Huang KH 2020        | ★★★  | ★   | ★★  | 6 |
| 50 | Wang JB 2020         | ★★★★ | ★★  | ★★  | 7 |
| 51 | Dong X 2021          | ★★★★ | ★★  | ★★★ | 9 |
| 52 | Jin X 2021           | ★★★  | ★★  | ★★  | 7 |
| 53 | Zhao B 2021          | ★★★★ | ★★  | ★★  | 8 |
| 54 | Bozkaya Y 2016       | ★★★  | ★   | ★★  | 6 |
| 55 | Gronnier C 2013      | ★★★★ | ★★  | ★★  | 8 |
| 56 | Lemoine N 2016       | ★★★  | ★★  | ★★  | 7 |
| 57 | Riihimäki M 2016     | ★★★  | ★★  | ★   | 6 |
| 58 | Piessen 2012         | ★★★  | ★★  | ★★  | 7 |
| 59 | Heger U 2014         | ★★★  | ★★  | ★★  | 7 |
| 60 | Schmidt T 2014       | ★★★  | ★★  | ★   | 6 |
| 61 | Voron T 2016         | ★★★★ | ★★  | ★★  | 8 |
| 62 | Khan N 2020          | ★★★★ | ★★★ | ★★  | 9 |
| 63 | Shridhar R 2013      | ★★★★ | ★★  | ★★  | 8 |
| 64 | Taghavi S 2012       | ★★★★ | ★   | ★★  | 7 |
| 65 | Bamboat ZM 2014      | ★★★  | ★★  | ★★★ | 8 |
| 66 | Postlewait LM 2015   | ★★★  | ★★  | ★★  | 7 |
| 67 | Charalampakis N 2016 | ★★★  | ★★  | ★★  | 7 |
| 68 | Liu K 2017           | ★★★★ | ★   | ★★  | 7 |

|           |                   |         |       |       |   |
|-----------|-------------------|---------|-------|-------|---|
| <b>69</b> | Luu C 2017        | ★ ★ ★   | ★ ★   | ★ ★   | 7 |
| <b>70</b> | Benesch MGK 2020  | ★ ★ ★ ★ | ★ ★   | ★ ★ ★ | 9 |
| <b>71</b> | Tang CT 2020      | ★ ★ ★ ★ | ★ ★   | ★ ★   | 7 |
| <b>72</b> | Wei Q 2020        | ★ ★ ★ ★ | ★ ★ ★ | ★ ★   | 9 |
| <b>73</b> | Zhao X 2021       | ★ ★ ★ ★ | ★ ★   | ★ ★ ★ | 9 |
| <b>74</b> | de Aguiar VG 2019 | ★ ★ ★   | ★     | ★ ★   | 6 |
