# Supplementary material for: Clinical Features of Gastric Signet Ring Cell Cancer: Results from a Systematic Review and Meta-Analysis
Source: MDPI journal article supplement (doi:10.3390/cancers15215191), 2023-10-28
Supplement: s1 [file s1]

**Table S3A.** General information of the selected studies.

[illegible]

[illegible]

|    |                      |    |    |    |           |           |      |      |         |         |     |      |                                                                      |
|----|----------------------|----|----|----|-----------|-----------|------|------|---------|---------|-----|------|----------------------------------------------------------------------|
| 57 | Riihimäki M 2016     | NS | -  | -  | -         | -         | -    | -    | -       | -       | -   | -    | NS                                                                   |
| 58 | Piessen 2012         | 6  | -  | -  | 21        | 39        | 25   | 54   | 33      | 47      | 17  | 18   | >50% of SRC                                                          |
| 59 | Heger U 2014         | 7  | 8  | 25 | 10        | 43        | 12   | 82   | 123     | 284     | 70  | 41   | >50% of SRC                                                          |
| 60 | Schmidt T 2014       | 7  | -  | -  | -         | -         | -    | -    | -       | -       | -   | -    | as described by the WHO                                              |
| 61 | Voron T 2016         | 7  | -  | -  | T0/T1 139 | T0/T1 212 | 252  | 338  | 361     | 243     | 147 | 107  | >50% of SRC and any diffuse-type + SRC                               |
| 62 | Khan N 2020          | 7  | 6  | 97 | 41        | 636       | 34   | 474  | 84      | 912     | 33  | 170  | presence of SRC                                                      |
| 62 | Shridhar R 2013      | 6  | NS | NS | NS        | NS        | NS   | NS   | NS      | NS      | NS  | NS   | NS                                                                   |
| 64 | Taghavi S 2012       | 6  | -  | -  | 510       | 2098      | 761  | 2254 | 574     | 1089    | 501 | 1082 | as described by the WHO                                              |
| 65 | Bamboato ZM 2014     | 7  | -  | -  | 50        | 113       | 18   | 51   | 46      | 116     | 96  | 79   | >50% of SRC                                                          |
| 66 | Postlewait LM 2015   | 7  | 1  | 5  | 58        | 128       | 29   | 74   | 105     | 142     | 118 | 100  | as described by the WHO                                              |
| 67 | Charalampakis N 2016 | 7  | NS | NS | NS        | NS        | NS   | NS   | NS      | NS      | NS  | NS   | as described by the WHO (Type 1: ≤10%, Type 2: 11-49%, Type 3: ≥50%) |
| 68 | Liu K 2017           | NS | -  | -  | 1099      | 4727      | 1442 | 5456 | 1012    | 2511    | 865 | 2183 | >50% of SRC                                                          |
| 69 | Luu C 2017           | NS | -  | -  | T1/2 22   | T1/2 44   | -    | -    | T3/4 17 | T3/4 66 | -   | -    | NS                                                                   |
| 70 | Benesch MGK 2020     | NS | NS | NS | NS        | NS        | NS   | NS   | NS      | NS      | NS  | NS   | >50% of SRC; mixed SRCC if <50%                                      |
| 71 | Tang CT 2020         | NS | -  | -  | 1182      | 102       | 2077 | 369  | 1351    | 199     | 655 | 82   | abundant intracellular mucin + compressed displaced nucleus          |
| 72 | Wei Q 2020           | 7  | -  | -  | 380       | 2056      | 187  | 921  | 600     | 2871    | 584 | 1545 | >50% of SRC                                                          |
| 73 | Zhao X 2021          | 7  | -  | -  | 811       | 1263      | 341  | 489  | 916     | 1173    | 938 | 748  | NS                                                                   |
| 74 | de Aguiar VG 2019    | 8  | NS | NS | NS        | NS        | NS   | NS   | NS      | NS      | NS  | NS   | >50% of SRC                                                          |

**Abbreviations.** JGCA: Japanese Gastric Cancer Association; NS: not specified; NSRCC: Non-Signet Ring Cell Carcinoma; OS: Overall Survival; SRC: Signet Ring Cell; SRCC: Signet Ring Cell Carcinoma; UDC: Undifferentiated Cancer; WHO: World Health Organization.

**Table S3B.** General information of the selected studies.

|    | Author          | Classification             | WHO<br>ed | Japanese<br>ed | Resection        | Chemotherapy | Specimen or biopsy | SURVIVAL | HR/RR for SRCC              |
|----|-----------------|----------------------------|-----------|----------------|------------------|--------------|--------------------|----------|-----------------------------|
| 1  | Efared B 2020   | WHO                        | 4th       | -              | ev resection     | NS           | specimen; biopsy   | OS       | -                           |
| 2  | Lee JH 2010     | WHO; Nakamura              | 2nd       | -              | R0               | -            | specimen           | -        | -                           |
| 3  | Nam MJ 2010     | Lauren; NS; Nakamura       | -         | -              | R0               | -            | specimen           | -        | -                           |
| 4  | Kim HM 2011     | Japanese                   | -         | 2nd            | R0               | -            | specimen           | -        | -                           |
| 5  | Tong JH 2011    | WHO; Nakamura              | 3rd       | -              | R0               | -            | specimen           | OS       | -                           |
| 6  | Huh CW 2013     | WHO                        | 2nd       | -              | R0               | -            | specimen           | OS       | -                           |
| 7  | Kim BS 2014     | WHO; Japanese              | NS        | 3rd            | R0               | -            | specimen           | -        | -                           |
| 8  | Guo CG 2015     | WHO; Japanese; Nakamura    | NS        | 3rd            | R0               | -            | specimen           | OS       | multiv RR for SRCC vs other |
| 9  | Jin EH 2015     | WHO; Japanese              | NS        | NS             | R0               | -            | specimen           | OS       | -                           |
| 10 | Lee SH 2015     | Japanese                   | -         | 2nd            | R0               | -            | specimen           | -        | -                           |
| 11 | Wang Z 2015     | WHO; Japanese              | 3rd       | 3rd            | R0               | -            | specimen           | OS       | multiv HR for SRCC vs other |
| 12 | Hwang CS 2016   | Japanese; Lauren; Nakamura | -         | 3rd            | R0               | -            | specimen           | -        | -                           |
| 13 | Imamura T 2016  | NS                         | -         | -              | R0               | -            | specimen           | OS       | multiv HR for SRCC vs other |
| 14 | Kim YH 2016     | WHO; Japanese; Lauren      | 4th       | NS             | R0 (surgery/ESD) | -            | specimen           | -        | -                           |
| 15 | Yoon HJ 2016    | WHO; Japanese; Lauren      | 3rd       | 3rd            | R0 (surgery/ESD) | -            | specimen           | -        | -                           |
| 16 | Bang CS 2017    | NS (Nakamura)              | -         | -              | R0/R+ (ESD)      | -            | specimen           | CRD      | -                           |
| 17 | Kang Sun H 2017 | NS (mix WHO+Japanese)      | -         | -              | R0               | -            | specimen           | -        | -                           |
| 18 | Lee IS 2017     | WHO; Japanese; Lauren      | NS        | 3rd            | R0               | -            | specimen           | -        | -                           |
| 19 | Horiuchi Y 2018 | NS (Japanese Nakamura)     | -         | -              | R0 (ESD)         | -            | specimen           | -        | -                           |
| 20 | Kwak DS 2018    | NS (Japanese Nakamura)     | -         | 3rd            | R0               | -            | specimen           | -        | -                           |
| 21 | Nakamura R 2019 | NS (Japanese)              | -         | -              | R0               | -            | specimen           | -        | -                           |
| 22 | Ryu DG 2019     | Japanese                   | -         | 4th            | R0               | -            | specimen           | -        | -                           |

|    |                 |                            |     |     |              |                                        |             |          |                                  |
|----|-----------------|----------------------------|-----|-----|--------------|----------------------------------------|-------------|----------|----------------------------------|
| 23 | Zhu ZL 2020     | Japanese; Lauren; Nakamura | -   | 3rd | R0           | -                                      | specimen    | -        | -                                |
| 24 | Zou Y 2020      | NS                         | -   | -   | R0           | -                                      | specimen    | -        | -                                |
| 25 | Zu H 2014       | WHO                        | 2nd | -   | R0           | NS                                     | specimen    | OS       | multiv HR for SRCC vs other      |
| 26 | Alshehri A 2020 | Japanese                   | -   | NS  | R0           | ev adjuvant CHT                        | specimen    | OS, RFS  | multiv HR for SRCC vs other      |
| 27 | Cho JH 2015     | NS                         | -   | -   | R0/R+        | palliative                             | not defined | OS       | univ+multiv HR for SRCC vs other |
| 28 | Men HT 2016     | NS                         | -   | -   | ev resection | IPC/systemic CHT                       | specimen    | OS       | univ+multiv HR for SRCC vs other |
| 29 | Choi JH 2020    | NS                         | -   | -   | ev resection | palliative                             | not defined | OS       | multiv HR for SRCC vs other      |
| 30 | Zhang M 2010    | WHO                        | 4th | -   | R0/R+        | ev adjuvant CHT                        | specimen    | OS       | -                                |
| 31 | Chiu CT 2011    | WHO                        | 2nd | -   | R0           | NS                                     | specimen    | OS       | -                                |
| 32 | Jiang CG 2011   | WHO                        | 2nd | -   | R0/R+        | ev adjuvant CHT                        | specimen    | OS       | multiv RR for SRCC vs other      |
| 33 | Lee HH 2012     | WHO; Japanese; Lauren      | 2nd | 2nd | R0/R+        | ev adjuvant CHT                        | specimen    | OS       | -                                |
| 34 | Bu Z 2013       | Japanese                   | -   | 1st | R0/R+        | NS                                     | specimen    | OS       | -                                |
| 35 | Jiang H 2013    | Japanese                   | -   | 2nd | R0/R+        | NS                                     | specimen    | OS       | -                                |
| 36 | Kwon KJ 2014    | NS (Nakamura)              | -   | -   | R0/R+        | ev adjuvant CHT                        | specimen    | OS       | univ HR for SRCC vs other        |
| 37 | Shim JH 2014    | WHO; Japanese mentioned    | 2nd | 2nd | R0           | ev adjuvant CHT                        | specimen    | OS       | univ+multiv HR for SRCC vs other |
| 38 | Liu X 2015      | WHO                        | 4th | -   | R0           | NS                                     | specimen    | OS       | multiv HR for SRCC vs other      |
| 39 | Hsu JT 2016     | Japanese                   | -   | 3rd | R0/R+        | ev adjuvant CHT                        | specimen    | OS       | multiv HR for SRCC vs other      |
| 40 | Kong P 2016     | WHO                        | 4th | -   | R0           | ev adjuvant CHT                        | specimen    | OS       | univ HR for SRCC vs other        |
| 41 | Lu M 2016       | WHO; Lauren                | 4th | -   | R0/R+        | ev neoadjuvant/adjuvant/palliative CHT | not defined | OS       | univ+multiv HR for SRCC vs other |
| 42 | Tang X 2016     | WHO; Lauren                | 4th | -   | R0           | ev adjuvant CHT                        | specimen    | OS       | -                                |
| 43 | Wang Z 2016     | NS                         | NS  | NS  | R0           | ev adjuvant CHT                        | specimen    | OS       | univ HR for SRCC vs other        |
| 44 | Chon HJ 2017    | WHO; Lauren                | 4th | -   | R0           | NS                                     | specimen    | OS, RFS  | multiv HR for SRCC vs other      |
| 45 | Chen J 2018     | WHO                        | 2nd | -   | R0           | NS                                     | specimen    | -        | -                                |
| 46 | Lee D 2018      | NS                         | -   | -   | R0           | ev adjuvant CHT                        | specimen    | DFS, CSS | -                                |

|    |                      |                    |     |     |                    |                             |             |         |                                  |
|----|----------------------|--------------------|-----|-----|--------------------|-----------------------------|-------------|---------|----------------------------------|
| 47 | Kao YC 2019          | NS                 | -   | -   | R0                 | NS                          | specimen    | OS, DFS | multiv HR for SRCC vs other      |
| 48 | Ahn H 2020           | WHO                | NS  | -   | R0/R+              | ev adjuvant CHT             | specimen    | OS      | univ+multiv HR for SRCC vs other |
| 49 | Huang KH 2020        | WHO                | 2nd | -   | R0                 | ev adjuvant CHT             | specimen    | OS      | univ RR for SRCC vs other        |
| 50 | Wang JB 2020         | WHO                | 4th | -   | R0                 | ev adjuvant CHT             | specimen    | OS      | -                                |
| 51 | Dong X 2021          | WHO                | 4th | -   | R0                 | ev adjuvant CHT             | specimen    | OS      | univ+multiv HR for SRCC vs other |
| 52 | Jin X 2021           | Japanese; Nakamura | -   | 3rd | R0                 | -                           | specimen    | -       | -                                |
| 53 | Zhao B 2021          | WHO; Japanese      | NS  | 2nd | R0                 | ev adjuvant CHT             | specimen    | DFS     | -                                |
| 54 | Bozkaya Y 2016       | WHO                | 2nd | -   | R0/R+              | ev adjuvant CHT             | specimen    | OS      | -                                |
| 55 | Gronnier C 2013      | WHO                | 2nd | -   | R0/R+              | ev adjuvant CHT             | specimen    | OS      | multiv HR for SRCC vs other      |
| 56 | Lemoine N 2016       | WHO                | 2nd | -   | ev resection       | palliative                  | not defined | OS, PFS | univ+multiv HR for SRCC vs other |
| 57 | Riihimäki M 2016     | WHO; Lauren        | NS  | -   | NS                 | NS                          | not defined | OS      | multiv HR for SRCC vs other      |
| 58 | Piessen 2012         | WHO                | 2nd | -   | R0/R+              | NS                          | biopsy      | OS      | multiv HR for SRCC vs other      |
| 59 | Heger U 2014         | WHO; Lauren        | NS  | -   | ev resection R0/R+ | neoadjuvant CHT             | not defined | OS      | multiv RR for SRCC vs other      |
| 60 | Schmidt T 2014       | WHO                | NS  | -   | R0/R+              | neoadjuvant                 | specimen    | OS      | multiv RR for SRCC vs other      |
| 61 | Voron T 2016         | WHO; Lauren        | 2nd | -   | R0/R+              | ev neoadjuvant/adjuvant CHT | specimen    | OS      | multiv HR for SRCC vs other      |
| 62 | Khan N 2020          | NS (WHO)           | -   | -   | R0/R+              | ev neoadjuvant/adjuvant CHT | specimen    | OS      | univ HR for SRCC vs other        |
| 63 | Shridhar R 2013      | NS                 | -   | -   | ev resection       | palliative                  | not defined | OS      | multiv HR for SRCC vs other      |
| 64 | Taghavi S 2012       | WHO                | 2nd | -   | NS                 | NS                          | not defined | OS      | univ+multiv HR for SRCC vs other |
| 65 | Bamboat ZM 2014      | WHO; Lauren        | 1st | -   | R0                 | ev adjuvant CHT             | specimen    | OS      | -                                |
| 66 | Postlewait LM 2015   | WHO                | 4th | -   | R0/R+              | ev neoadjuvant/adjuvant CHT | specimen    | OS, RFS | multiv HR for SRCC vs other      |
| 67 | Charalampakis N 2016 | WHO                | 4th | -   | R0/R+              | neoadjuvant CRT             | specimen    | OS, RFS | univ+multiv HR for SRCC vs other |
| 68 | Liu K 2017           | WHO                | 4th | -   | NS                 | NS                          | not defined | OS      | -                                |
| 69 | Luu C 2017           | Lauren             | -   | -   | R0/R+              | ev neoadjuvant/adjuvant CHT | specimen    | OS      | multiv HR for SRCC vs other      |
| 70 | Benesch MGK 2020     | WHO                | 5th | -   | ev resection       | ev CHT/RT                   | not defined | OS      | univ+multiv HR for SRCC vs other |
| 71 | Tang CT 2020         | WHO                | 5th | -   | resection          | ev adjuvant CHT             | specimen    | OS, CSS | multiv HR for SRCC vs other      |

|    |                   |             |     |   |              |                 |             |         |                             |
|----|-------------------|-------------|-----|---|--------------|-----------------|-------------|---------|-----------------------------|
| 72 | Wei Q 2020        | WHO         | 4th | - | NS           | NS              | NS          | OS      | -                           |
| 72 | Zhao X 2021       | WHO         | 4th | - | ev resection | NS              | NS          | OS, CSS | multiv HR for SRCC vs other |
| 74 | de Aguiar VG 2019 | WHO; Lauren | 4th | - | ev resection | ev adjuvant CHT | not defined | OS      | multiv HR for SRCC vs other |

**Abbreviations.** CHT: Chemotherapy; CRD: Cancer Related Death; CSS: Cancer Specific Survival; DFS: Disease Free Survival; ESD: Endoscopic Submucosal Dissection; ev: eventual; IPC: Intraperitoneal Chemotherapy; JGCA: Japanese Gastric Cancer Association; MDA: Moderately Differentiated Adenocarcinoma; multiv: multivariate; NS: not specified; OS: Overall Survival; PDA: Poorly Differentiated Adenocarcinoma; PFS: Progression Free Survival; RFS: Relapse Free Survival; R0: radical resection; R+: non-radical resection; RT: Radiotherapy; SRC: Signet Ring Cell; SRCC: Signet Ring Cell Carcinoma; UDC: Undifferentiated Cancer; univ: univariate; WDA: Well Differentiated Adenocarcinoma; WHO: World Health Organization; WMDA: Well/Moderately Differentiated Adenocarcinoma.
