# Supplementary material for: Clinical Features of Gastric Signet Ring Cell Cancer: Results from a Systematic Review and Meta-Analysis
Source: MDPI journal article supplement (doi:10.3390/cancers15215191), 2023-10-28
Supplement: s1 [file s1]

**Table S1.** Search terms used in PubMed.

| Step |                                                                                                                                                                                                                                                     |
|------|-----------------------------------------------------------------------------------------------------------------------------------------------------------------------------------------------------------------------------------------------------|
| 1    | ((Stomach[MeSH Terms]) OR Stomach[Title/Abstract]) OR Gastric[Title/Abstract]<br>Filters: English; Field: Title/Abstract                                                                                                                            |
| 2    | (((((Neoplasm[MeSH Terms]) OR Neoplasm[Title/Abstract]) OR Carcinoma[MeSH Terms]) OR Carcinoma[Title/Abstract]) OR Adenocarcinoma[MeSH Terms]) OR Adenocarcinoma[Title/Abstract]) OR Cancer[Title/Abstract] Filters: English; Field: Title/Abstract |
| 3    | ((((Carcinoma, Signet Ring Cell[Title/Abstract]) OR Carcinoma, Signet Ring Cell[MeSH Terms]) OR Signet Ring[Title/Abstract]) OR Signet Ring Cell[Title/Abstract] Filters: English; Field: Title/Abstract                                            |
| 4    | Combination 1 AND 2 AND 3                                                                                                                                                                                                                           |
