# Supplementary figures and images for: Clinical Features of Gastric Signet Ring Cell Cancer: Results from a Systematic Review and Meta-Analysis
Source: MDPI journal article supplement (doi:10.3390/cancers15215191), 2023-10-28

**Figure S4** Funnel plot and Egger's Test

**Figure S4A** All stage GC Survival

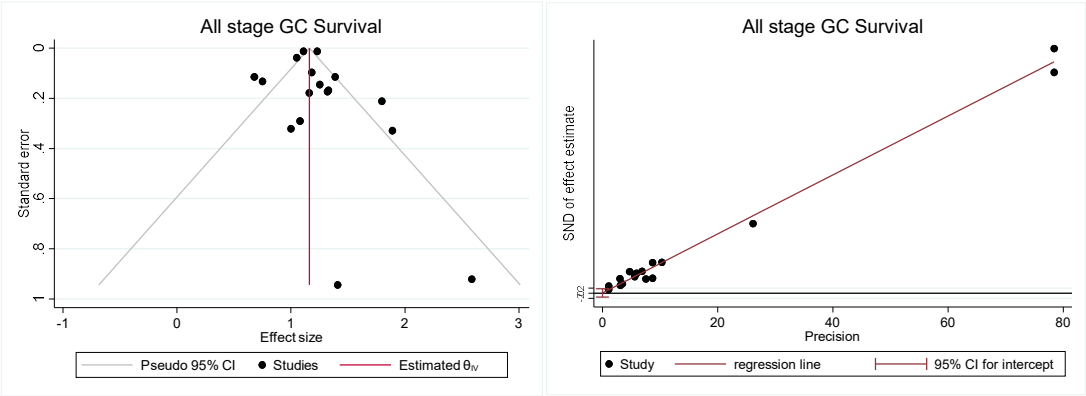

**Figure S4B** Early GC Survival

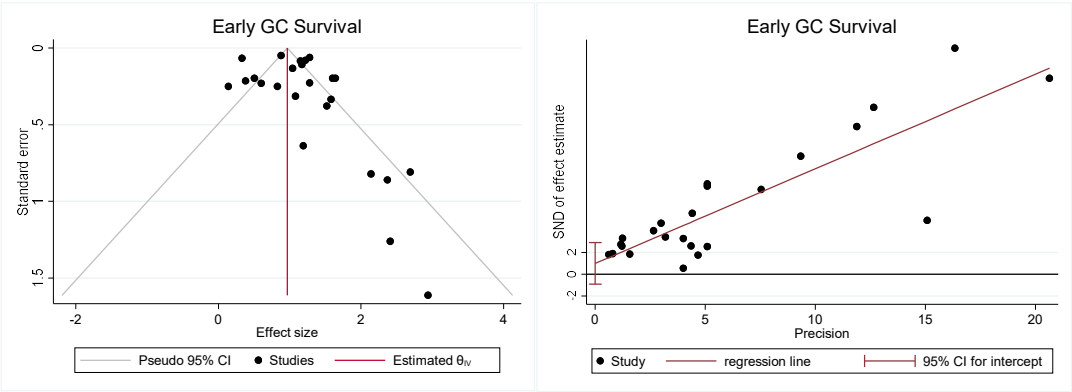

Supplement: s1 [file s1]
